# Supplementary material
Source: PubMed Central journal article supplement (PMC2687078)
Supplement: NIHMS4238-supplement-1.pdf [file NIHMS4238-supplement-1.pdf]

**Supplementary Table 1 | Components of the slit diaphragm and their fly orthologues**

| Human gene/protein | Disease/phenotype                                 | Fly orthologues                                                                              |
|--------------------|---------------------------------------------------|----------------------------------------------------------------------------------------------|
| NPHS1/nephrin      | Congenital nephrotic syndrome of the Finnish type | <i>sticks and stones</i> <sup>1</sup><br><i>hibris</i> <sup>2</sup>                          |
| neph1              | Experimental congenital nephrotic syndrome        | <i>dumbfounded (kirre)</i> <sup>3</sup><br><i>roughest (irregular chiasm-C)</i> <sup>4</sup> |
| NPHS2/podocin      | Experimental congenital nephrotic syndrome        | <i>Mec2</i> <sup>*</sup>                                                                     |
| CD2AP              | Sporadic and inherited nephrotic syndromes        | <i>CG31012</i> <sup>5</sup>                                                                  |
| ZO-1               | Not known                                         | <i>polychaetoid</i> <sup>6</sup>                                                             |

\* There are seven stomatin domain-containing proteins in *Drosophila* with similarity to podocin. *Mec2* is the only one expressed in nephrocytes (data not shown).

1. Bour, B. A., Chakravarti, M., West, J. M. & Abmayr, S. M. *Drosophila* SNS, a member of the immunoglobulin superfamily that is essential for myoblast fusion. *Genes Dev* **14**, 1498-511 (2000).
2. Artero, R. D., Castanon, I. & Baylies, M. K. The immunoglobulin-like protein *Hibris* functions as a dose-dependent regulator of myoblast fusion and is differentially controlled by Ras and Notch signaling. *Development* **128**, 4251-64 (2001).
3. Ruiz-Gomez, M., Coutts, N., Price, A., Taylor, M. V. & Bate, M. *Drosophila* *dumbfounded*: a myoblast attractant essential for fusion. *Cell* **102**, 189-98 (2000).
4. Strunkelberg, M. et al. *rst* and its paralogue *kirre* act redundantly during embryonic muscle development in *Drosophila*. *Development* **128**, 4229-39 (2001).
5. Johnson, R. I., Seppa, M. J. & Cagan, R. L. The *Drosophila* CD2AP/CIN85 orthologue *Cindr* regulates junctions and cytoskeleton dynamics during tissue patterning. *J Cell Biol* **180**, 1191-204 (2008).
6. Takahisa, M. et al. The *Drosophila* *tamou* gene, a component of the activating pathway of extramacrochaetae expression, encodes a protein homologous to mammalian cell-cell junction-associated protein ZO-1. *Genes Dev* **10**, 1783-95 (1996).

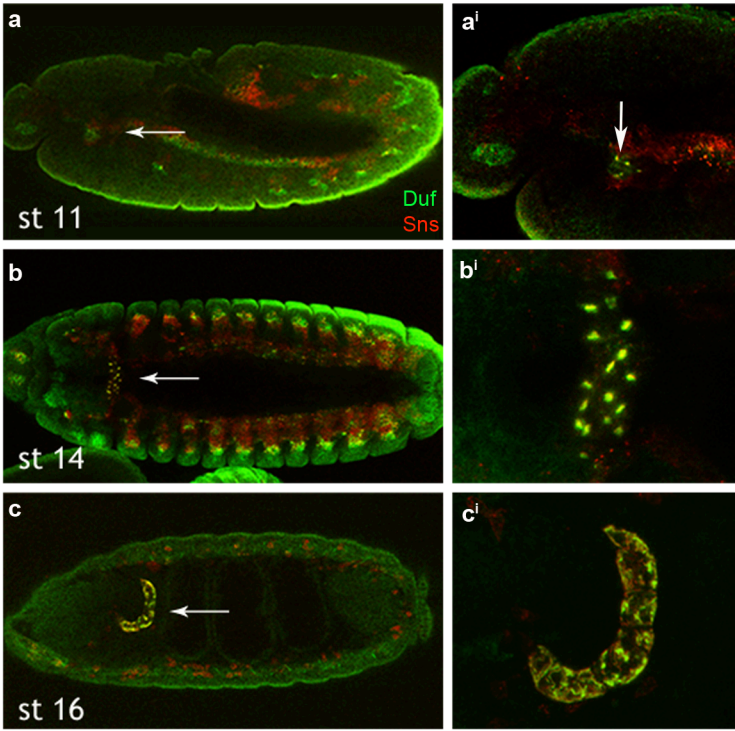

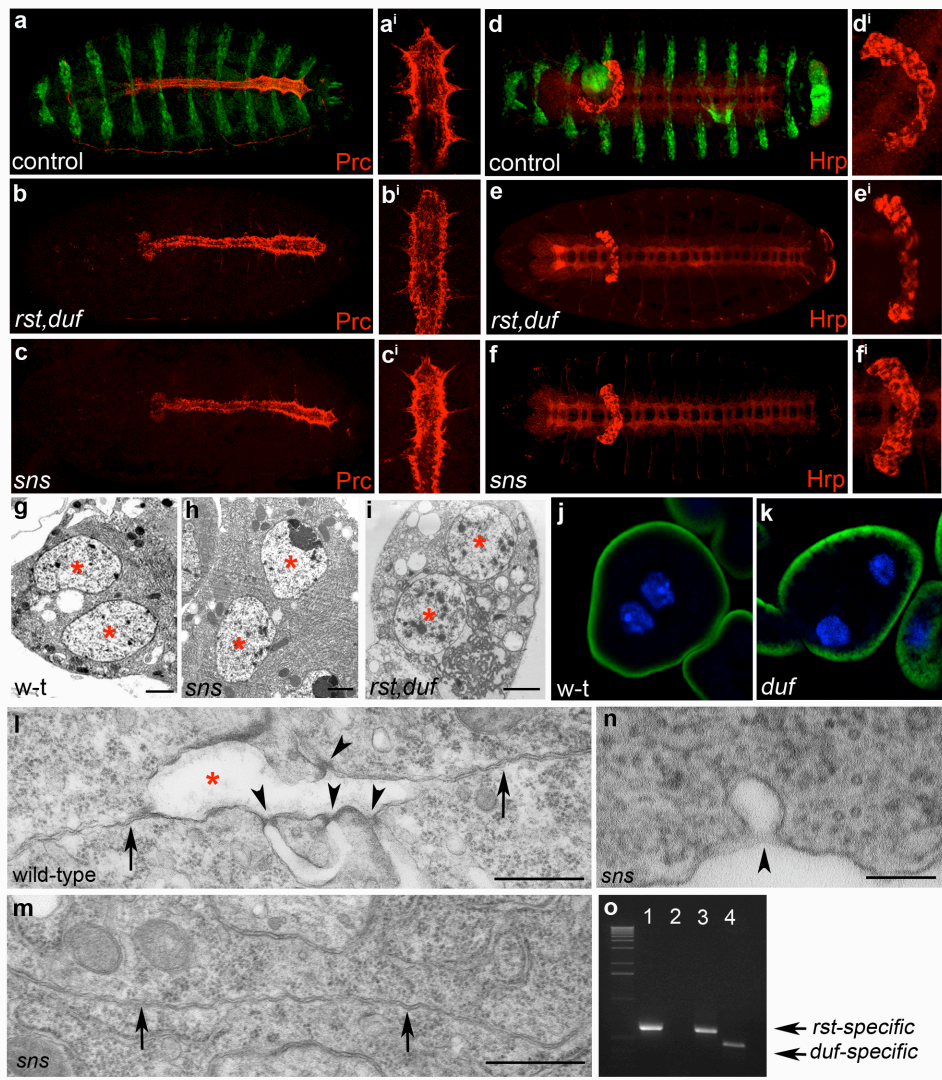

**a**

Viking-GFP (Collagen IV)

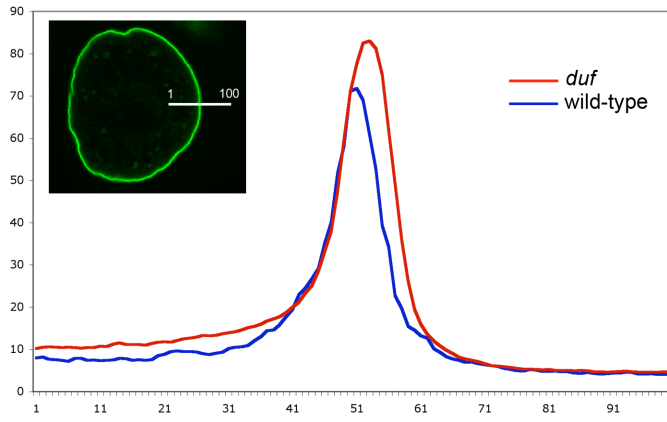

**b**

F-Actin

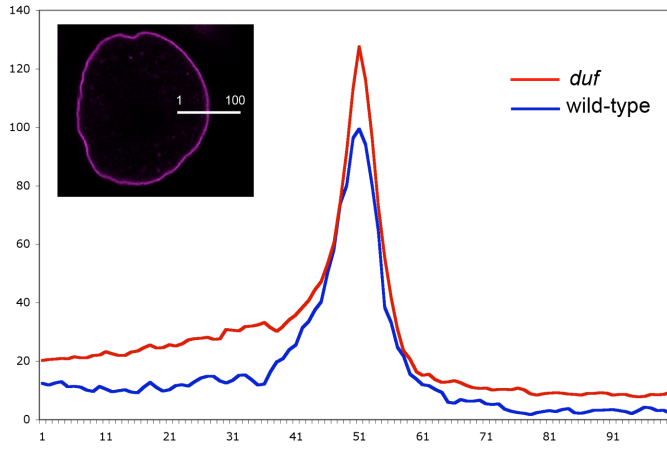

|           |       |                                                       |     |     |     |     |
|-----------|-------|-------------------------------------------------------|-----|-----|-----|-----|
|           | (1)   | 1                                                     | 10  | 20  | 30  | 46  |
| Mec2      | (1)   | -----ME PHQDSPVYANYEDMRNS G-----                      |     |     |     |     |
| podocin   | (1)   | MERRARSSSRESRGRGGRT PHKENKRAKAERSGGGR GRQEAGPEPS      |     |     |     |     |
|           |       |                                                       |     |     |     |     |
|           | (47)  | 47                                                    | 60  | 70  | 80  | 92  |
| Mec2      | (21)  | -----FASSTAYMVNMGAAGMAPPALRVPGTTQQYRGFKT              |     |     |     |     |
| podocin   | (47)  | GSGRAGTPGE PRAPAA TVDVDEVRGSGEEGTEVVALLESE RPEEG      |     |     |     |     |
|           |       |                                                       |     |     |     |     |
|           | (93)  | 93                                                    | 100 | 110 | 120 | 138 |
| Mec2      | (57)  | SENEPKGCM EWVVTLFSVLI FIIITSPIAIFICFKVVAEYERAIIFR     |     |     |     |     |
| podocin   | (93)  | TKSSGLGAC EWLVLISLFIIMTFPFSIWF CVKVVQ EYERVIIIFR      |     |     |     |     |
|           |       | tm                                                    |     |     |     |     |
|           |       |                                                       |     |     |     |     |
|           | (139) | 139                                                   | 150 | 160 | 170 | 184 |
| Mec2      | (103) | LGR LSGGAR-GPGMFFI LPCI DEYRKVDLR TVTFNV PQQ EMLTKDS  |     |     |     |     |
| podocin   | (139) | LGHLLPGR AKG PGLFF L PCLD TYHKVDLR LQ TLEI PFHEIVTKDM |     |     |     |     |
|           |       |                                                       |     |     |     |     |
|           | (185) | 185                                                   | 190 | 200 | 210 | 230 |
| Mec2      | (148) | VTVTVD AVVYRISDPLYAVIQVEDYSMSTRLLAATTLRNIVGTRN        |     |     |     |     |
| podocin   | (185) | FIMEIDAICYRMENASLLLSSLAHVSKAVQFLVQTTMKRLLAHR S        |     |     |     |     |
|           |       |                                                       |     |     |     |     |
|           | (231) | 231                                                   | 240 | 250 | 260 | 276 |
| Mec2      | (194) | LSELLTERETLAHNMQATLDEATEPWGVMVERVEIKDVS LPVSMQR       |     |     |     |     |
| podocin   | (231) | LTEILLERKSI AQDAKVALDSVTCIWGIKVERIEIKDVR LPAGLQH      |     |     |     |     |
|           |       | stomatin                                              |     |     |     |     |
|           |       |                                                       |     |     |     |     |
|           | (277) | 277                                                   | 290 | 300 | 310 | 322 |
| Mec2      | (240) | AMAAEAEAARDARAKVIAAEGEKKSATLKEASDVISASPSALQLR         |     |     |     |     |
| podocin   | (277) | SLAVEAEAQRQA KVRMIAA EA EKAASESLRMAAEILSGT PAAVQLR    |     |     |     |     |
|           |       |                                                       |     |     |     |     |
|           | (323) | 323                                                   | 330 | 340 | 350 | 368 |
| Mec2      | (286) | YLQTLSSISA EKNSTIIFPLPME LLTPYLA KYAHLMGPP FELKQSP    |     |     |     |     |
| podocin   | (323) | YLH TLQSLSTEK PSTVVLPLPFDLLNCLSSPSNR TQGS LFPF--SP    |     |     |     |     |
|           |       |                                                       |     |     |     |     |
|           | (369) | 369                                                   | 389 |     |     |     |
| Mec2      | (332) | EKSDNIVLDAIDAWPKTNL--                                 |     |     |     |     |
| podocin   | (367) | SK----PVEPLNPKKKDSPML                                 |     |     |     |     |
| Consensus | (369) | K                                                     | LDL | K   |     |     |
